# Supplementary material for: HACS1 signaling adaptor protein recognizes a motif in the paired immunoglobulin receptor B cytoplasmic domain
Source: Springer Nature journal article supplement (doi:10.1038/s42003-020-01397-z), 2020-11-13
Supplement: MOESM1 [file 42003_2020_1397_MOESM1_ESM.pdf]

## Supplementary Information

### HACS1 signaling adaptor protein recognizes a motif in the Paired Immunoglobulin Receptor B cytoplasmic domain

Jamie J Kwan, Sladjana Slavkovic, Michael Piazza, Dingyan Wang, Thorsten Dieckmann, Philip E. Johnson, Xiao-Yan Wen, and Logan W Donaldson

|           |                                                                                        |
|-----------|----------------------------------------------------------------------------------------|
| Table S1  | Chemical shift assignment summary for the HACS1 SH3 domain                             |
| Figure S1 | Sequence alignment of murine and human HACS1                                           |
| Figure S2 | SEC-MALS study of the HACS1 SH3 domain                                                 |
| Figure S3 | Graphical summary of backbone and side chain assignments                               |
| Figure S4 | Scatter plot of observed and expected residual dipolar couplings                       |
| Figure S5 | NMR relaxation analysis of the HACS1 SH3 domain                                        |
| Figure S6 | Differential scanning calorimetry of the HACS1 SH3 domain                              |
| Figure S7 | Western detection of the HACS1-PIRB interaction from human tissue                      |
| Figure S8 | Isothermal titration calorimetry binding study of PIRB-ITIM3 with the HACS1 SH3 domain |
| Figure S9 | Sequence analysis of murine PIRB                                                       |

| <b>Category</b>   | <b>Available</b> | <b>Assigned</b> | <b>% assigned</b> |
|-------------------|------------------|-----------------|-------------------|
| Element C         | 300              | 257             | 85.7              |
| Element H         | 367              | 341             | 92.9              |
| Element N         | 79               | 61              | 77.2              |
| Backbone + H + HA | 307              | 295             | 96.1              |
| Backbone          | 183              | 173             | 94.5              |
| Side chain H      | 243              | 219             | 90.1              |
| Side chain non-H  | 196              | 145             | 74.0              |

**Table S1** – Chemical shift assignment summary for the HACs1 SH3 domain (aa. 27-87). The first twenty-six amino acids are unassigned. This table was produced by CCPN Analysis v2.4.

|        |        |                                                                |     |
|--------|--------|----------------------------------------------------------------|-----|
| Q9NSI8 | mHACS1 | MLKRKPSNVSEKEKHQPKRSSSFGNFDRFRNNSLSKPDDSTEAEHGDPTNGSGEQSKTS    |     |
| P57725 | hHACS1 | MLKRKPSNASDKEKHQPKRSSSFGNFDRFRNNSVSKSDDSEVVDRELTNGSEEQSKTS     |     |
| Q9NSI8 | mHACS1 | NNGGGLGKKMRAISWTMKKKVGKKYIKALSEEKDEEDGENAHPYRNSDPVI GTHTEKVSL  |     |
| P57725 | hHACS1 | SSGGLGKKVRAISWTMKKKVGKKYIKALSEEKEEESGEEALPYRNSDPMIGTHTEKISL    |     |
| Q9NSI8 | mHACS1 | KASDSMDSLYSGQSSSSGITSCSDGTSNRDSFRLDDDDGPYSGPFCGRARVHTDFTPSPYD  | SH3 |
| P57725 | hHACS1 | KASDSMDSLYSGQSSSSGITSCSDGTSNRDSFRLDDDDSPYSGPFCGRAKVHTDFTPSPYD  |     |
| Q9NSI8 | mHACS1 | TDSLKIKKGDIIIDIICKTPMGMWTGMLNNKVGNFKFIYVDVISEEEAAPPKIKANRRSNS  |     |
| P57725 | hHACS1 | TDSLKIKKGDIIIDIICKTPMGMWTGMLNNKVGNFKFIYVDVILEEEAAPPKIKVPRSRRR  |     |
| Q9NSI8 | mHACS1 | KKSKTLQEFLEIRIHLQEYTSLLLNGYETLEDLKD IKESH LIELNIENPDRRRLLSAAE  | SAM |
| P57725 | hHACS1 | ENHQTIQEFLEIRIHLQEYTSLLLNGYETLDDLKD IKESH LIELNIADPEDRARLLSAAE |     |
| Q9NSI8 | mHACS1 | NFLEEEIIQEQENEPEPLSLSSDISLNKSQLDDCPRDSGCYISSGNSDNGKEDLESENLS   |     |
| P57725 | hHACS1 | SLLEETTVEHEKESVPLSSNPDI-LSASQLEDCPRDSGCYISSENSDNGKEDLESENLS    |     |
| Q9NSI8 | mHACS1 | DMVHKIIITEPSD                                                  |     |
| P57725 | hHACS1 | DMVQKIAITESD                                                   |     |

**Figure S1** — Sequence alignment of murine and human HACS1. Each protein is also referenced by its Uniprot code. Shading indicates identity. The SH3 and SAM domains are indicated.

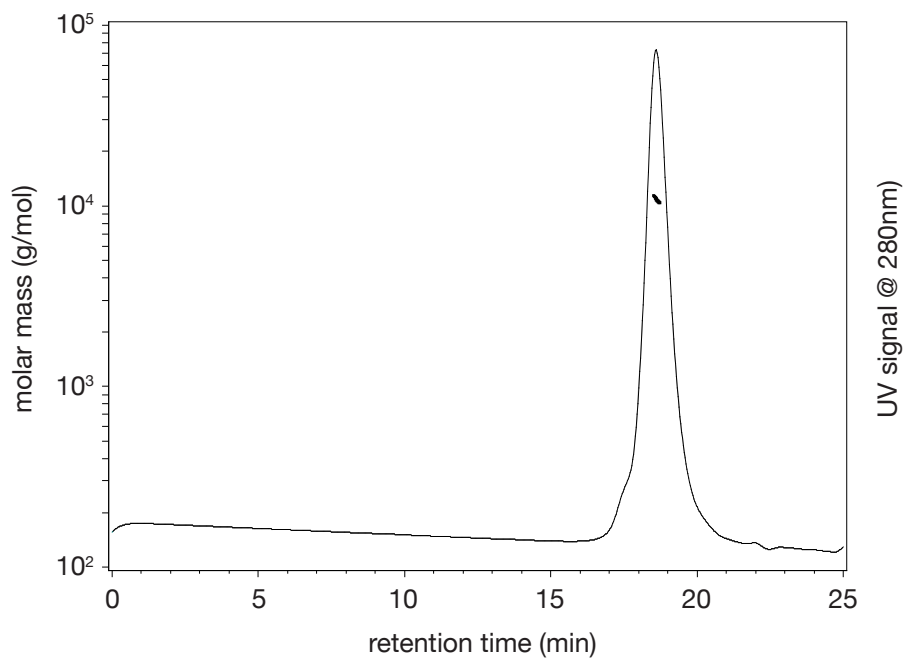

**Figure S2** — Size exclusion chromatography with multi-angle laser scatter (SEC-MALS) analysis. 20  $\mu$ L of 2 mg/mL HACs1 SH3 domain was subjected to chromatography (mobile phase: phosphate buffered saline) and detection by UV absorbance, MiniDAWN TREOS MALS, and OptiLAB T-rEX refractive index instruments. After data processing, the observed peak coincides with a molecular mass of  $10.9 \pm 0.3$  kDa suggesting that the HACs1 SH3 domain is monomeric (expected molecular mass, 10.65 kDa).

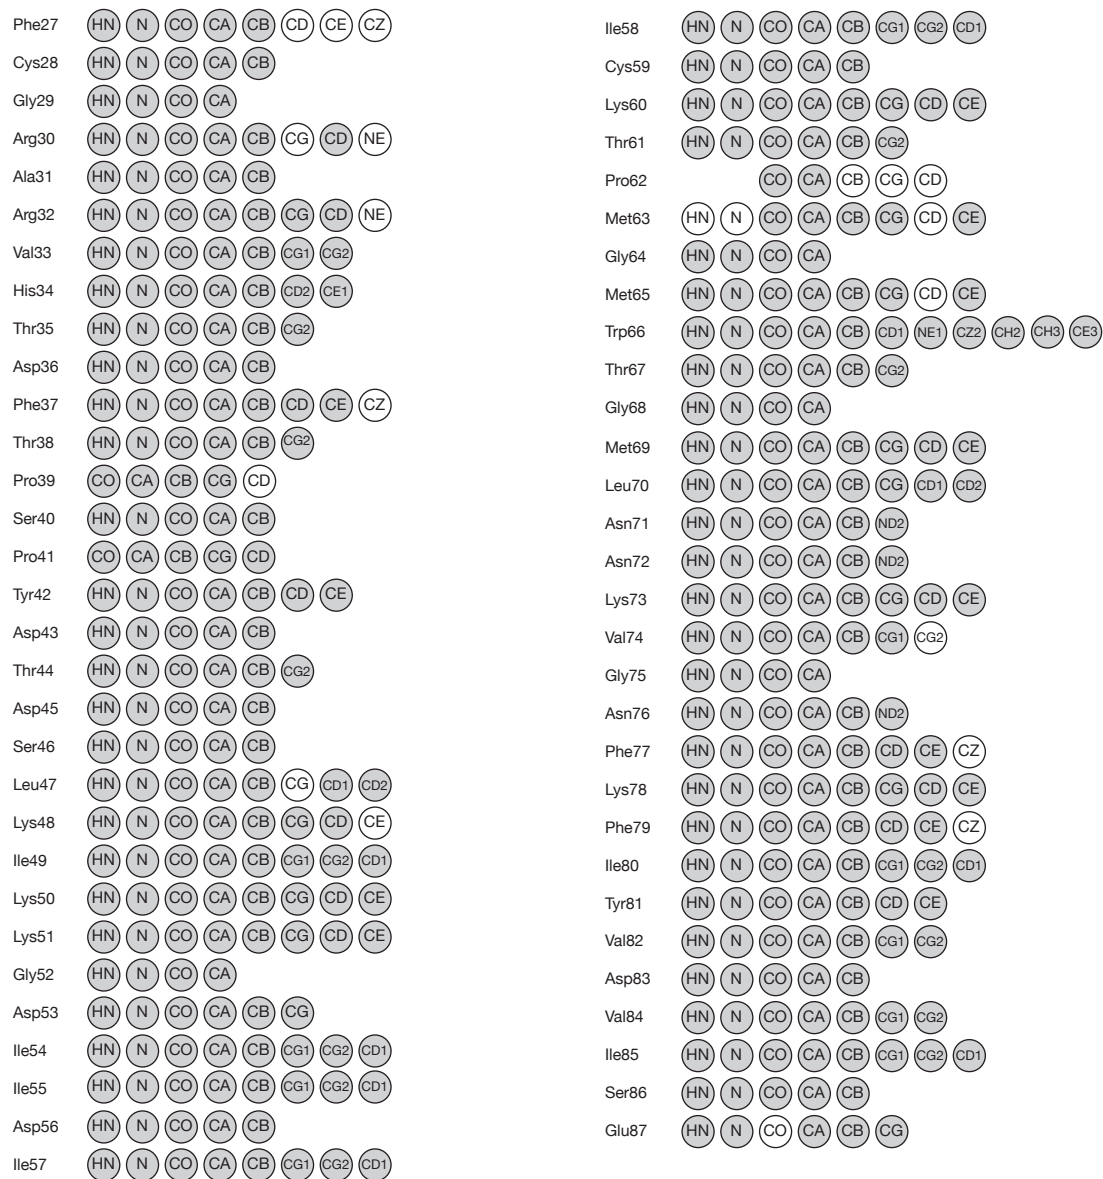

**Figure S3** – Graphical summary of backbone and side chain heavy atom assignments for the HACS1 SH3 domain. The first twenty-six amino acids of the protein fragment are unassigned. Shading indicates that an assignment was made.

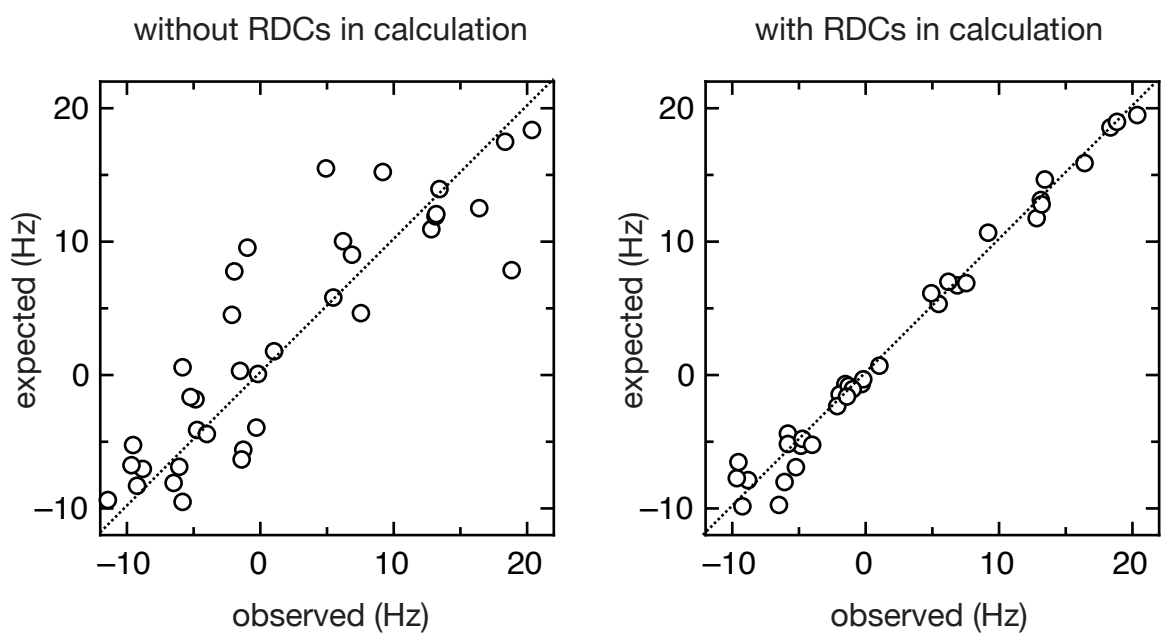

**Figure S4** — Scatter plot of observed and expected HN residual dipolar couplings (RDCs) for the lowest energy structure of an ensemble that was calculated without or without the RDC dataset ( $n=42$ ). Statistics are presented in Table 1 of the main text.

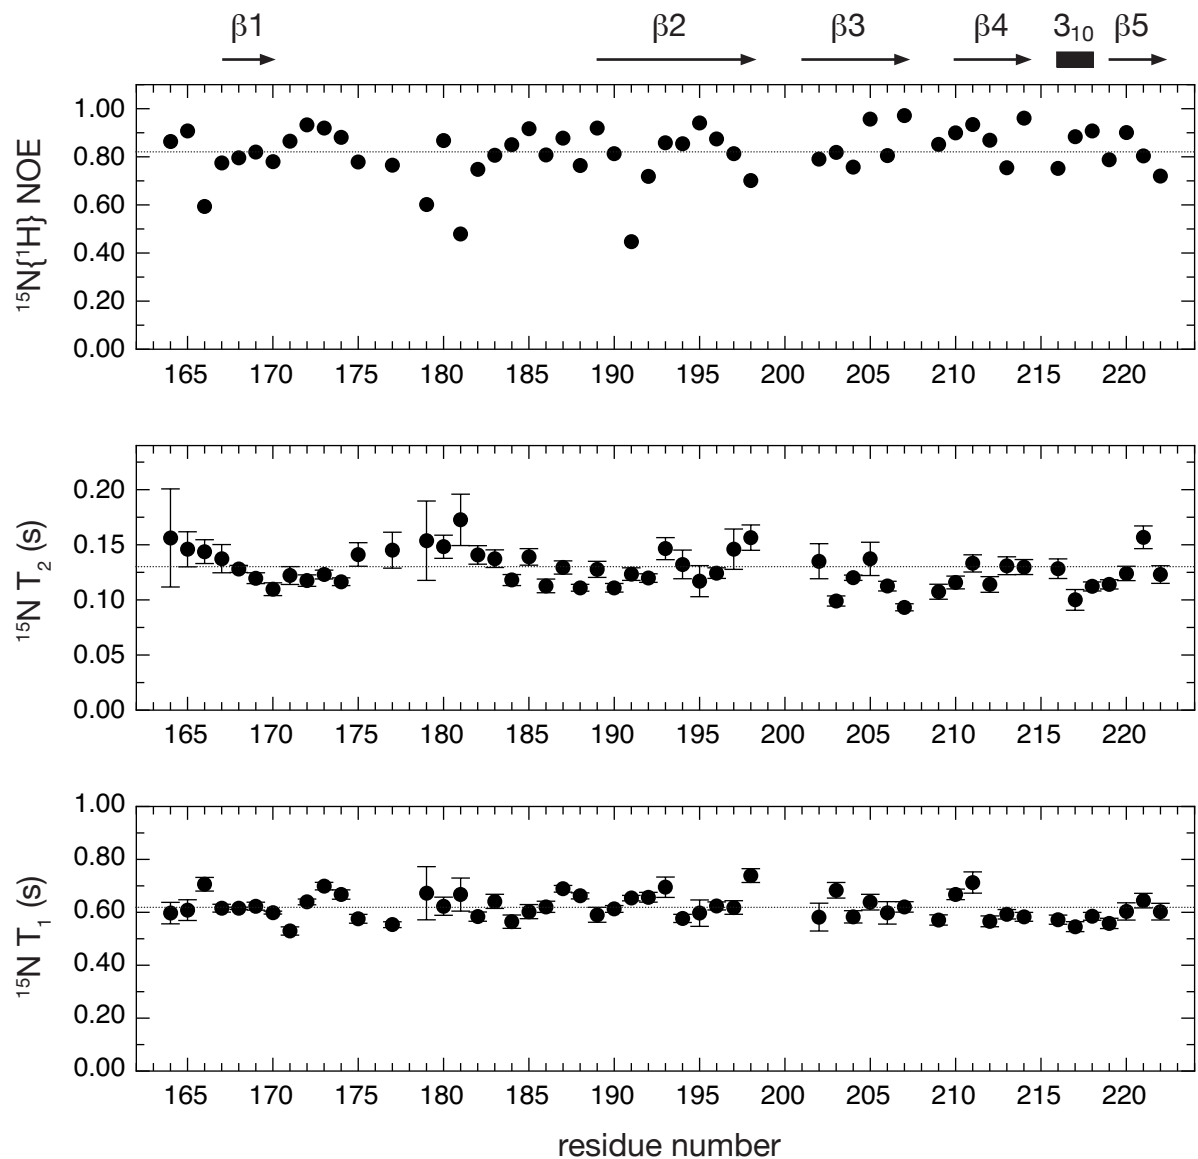

**Figure S5** — NMR relaxation analysis of the HACS1 SH3 domain. Data were acquired at 25°C on a 700 MHz spectrometer. Observed secondary structures are indicated above the graphs for reference. A dotted line indicates the average value. Error bars indicate the standard deviation of the fit to a monoexponential rate.

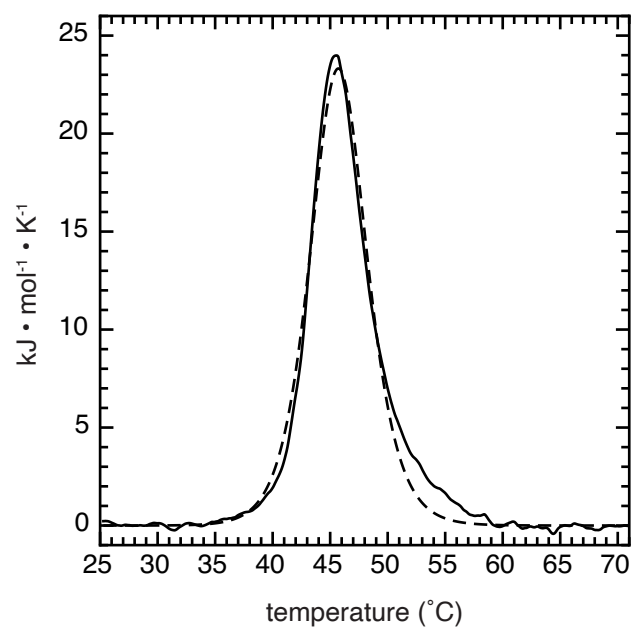

**Figure S6** — Differential scanning calorimetry of the HACS1 SH3 domain. The unfolding was not reversible with a thermal transition midpoint ( $T_m$ ) of 47.5  $^{\circ}\text{C}$ .

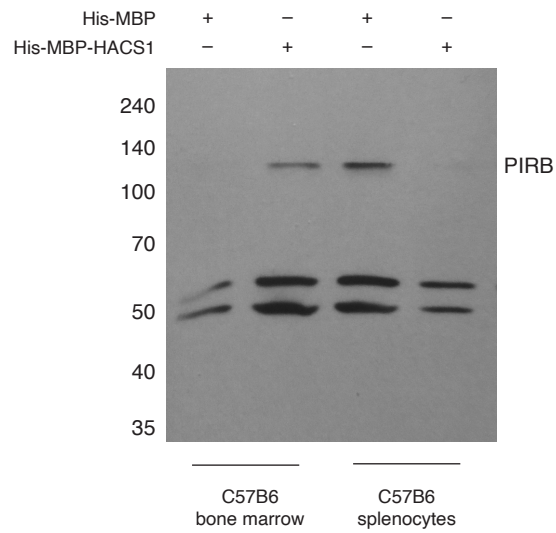

**Figure S7** — Western detection of the HACS1-PIRB interaction. Immunoprecipitations: Lanes 1 and 2: C57B6 mouse bone marrow protein lysate with 6xHis-MBP control protein and 6xHis-MBP-HACS1-SH3 protein, respectively. Lanes 3 and 4: C57B6 mouse splenocyte protein extract with 6xHis-MBP-HACS1-SH3 protein and 6xHis-MBP control protein, respectively.

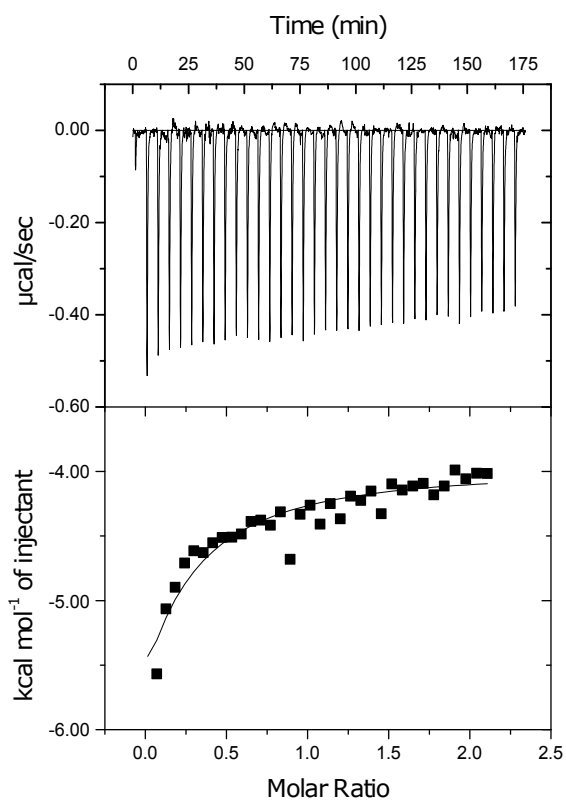

**Figure S8** — Isothermal titration calorimetry. A reaction cell containing 91  $\mu\text{M}$  HACS1 SH3 domain in 20 mM Tris pH 7.9, 50 mM NaCl, 1 mM TCEP was titrated with a 1.0 mM murine PIRB ITIM3 sequence fused amino-terminally to the Protein G B1 domain for enhanced solubility. This figure represents data that were adjusted for heat of dilution. The data were fit to 1:1 binding equilibrium with  $K_D$  of 15.9  $\mu\text{M}$ .

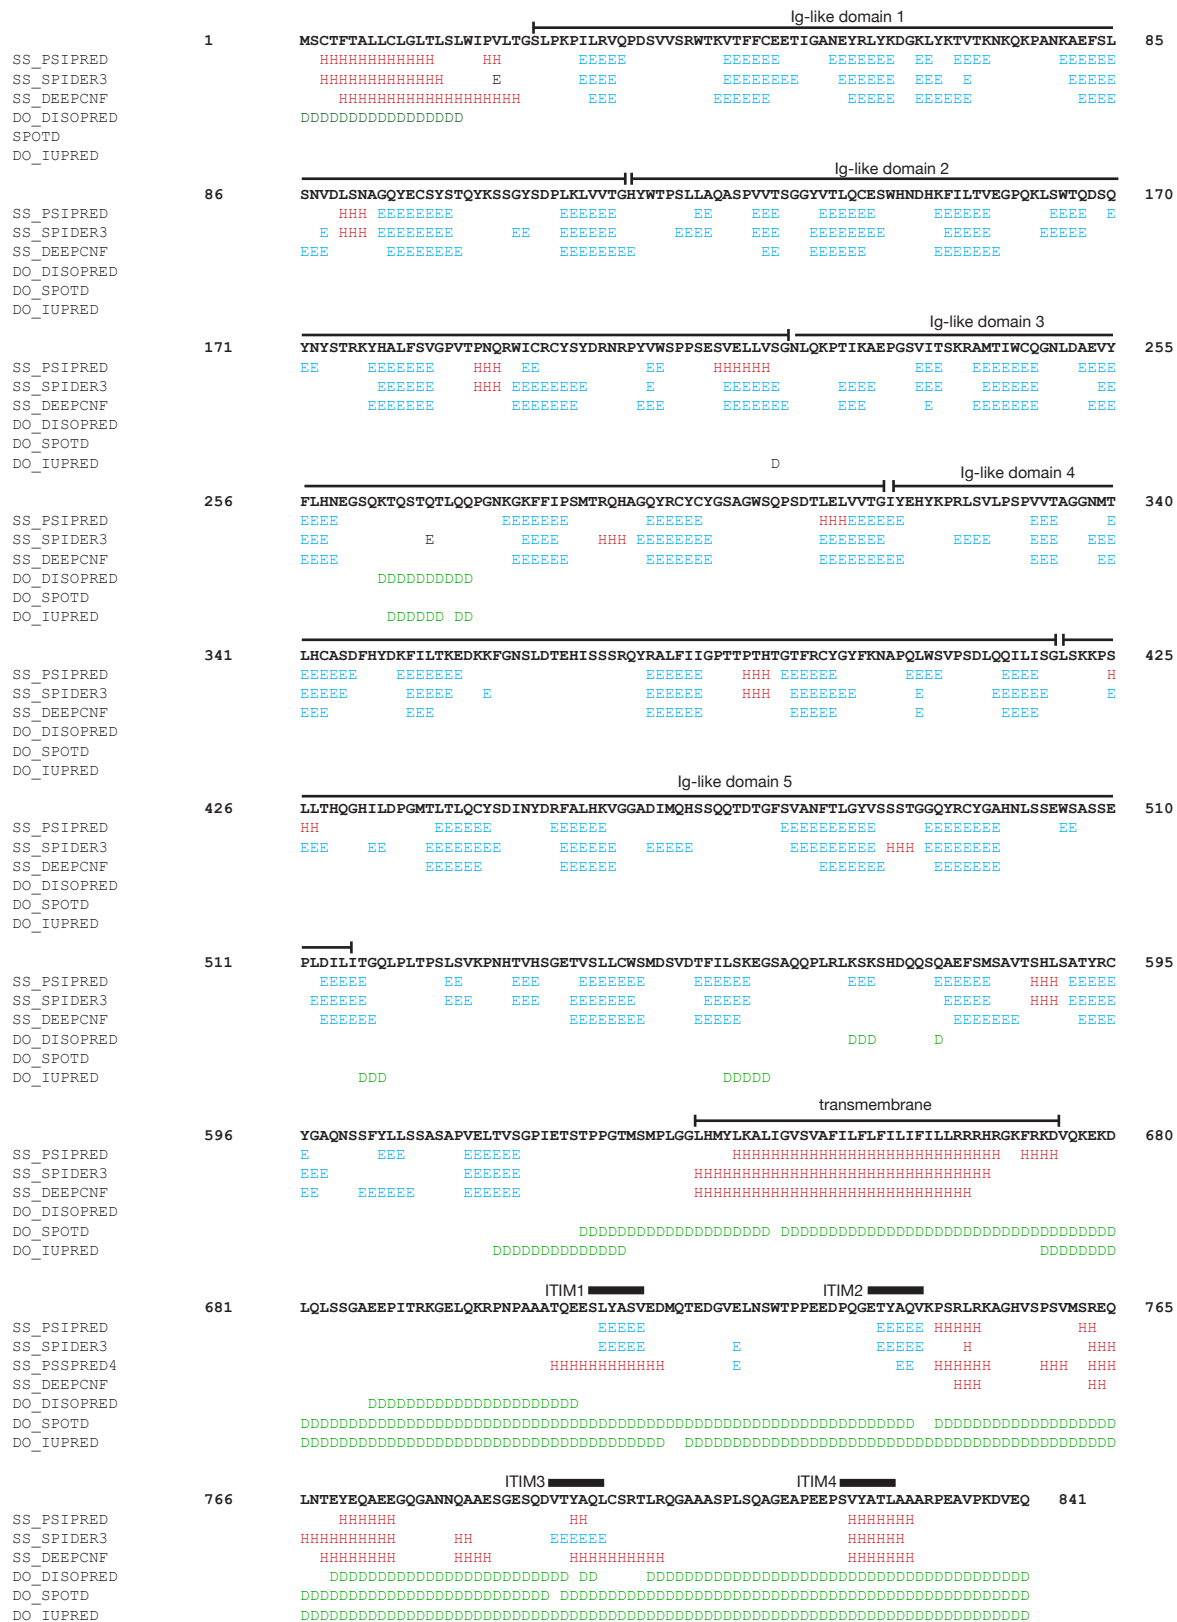

**Figure S9** — Sequence analysis of murine PIRB. Helical (H), strand (S) and disordered (D) regions were predicted by PSIPRED (Buchan & Jones. 2019. Nucl Acids Res 47: W402), SPIDER3 (Heffernan *et al.* 2017. Bioinformatics 33:2842), DEEPCNF (Wang *et al.* 2016. Sci Rep 11:18962), DISOPRED3 (Jones & Cozzetto. 2015. Bioinformatics 31: 857), SPOTD (Hanson *et al.* 2017. Bioinformatics 33: 685) and IUPRED (Dosztányi *et al.* 2005. J Mol Biol 347: 827). The Ig repeats, transmembrane region, and ITIMs 1-4 are indicated. Ig-like domain boundaries are derived from the PIRB extracellular domain crystal structure (PDB:6GRQ; Vlieg *et al.* 2019. J Biol Chem 294: 4634).
